# Supplementary material for: Impact of COVID-19 on ‘Start Smart, Then Focus’ Antimicrobial Stewardship at One NHS Foundation Trust in England Prior to and during the Pandemic
Source: MDPI journal article supplement (doi:10.3390/covid4010010), 2024-01-21
Supplement: s1 [file s1]

Archive with 1 entries (1 files):
- covid-2775404-supplementary.pdf
