# Supplementary material for: Impact of COVID-19 on ‘Start Smart, Then Focus’ Antimicrobial Stewardship at One NHS Foundation Trust in England Prior to and during the Pandemic
Source: MDPI journal article supplement (doi:10.3390/covid4010010), 2024-01-21
Supplement: s1 [file s1 › covid-2775404-supplementary.pdf]

## Supplement Materials

Figure S1. Mind map organises data extraction for antimicrobial stewardship.

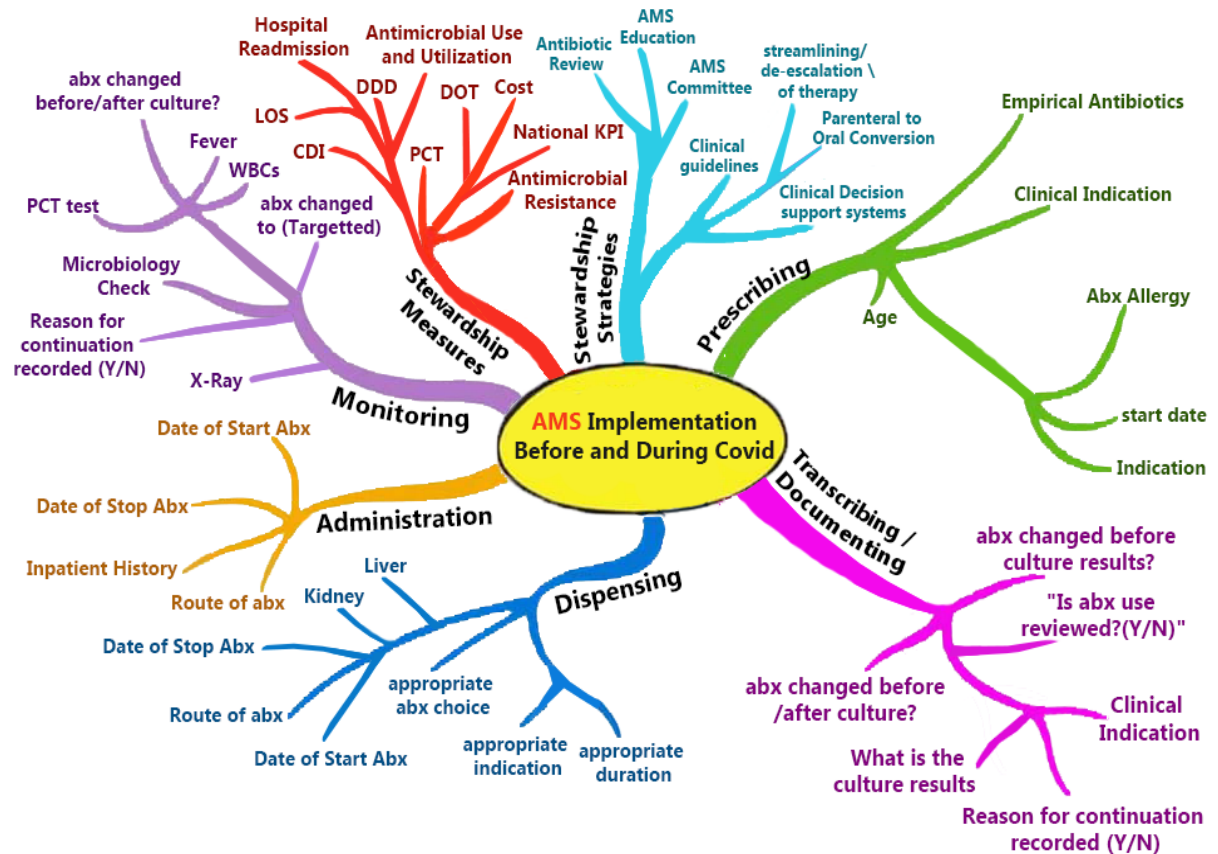

**Figure S2.** Framework used for data analysis used in this retrospective study.

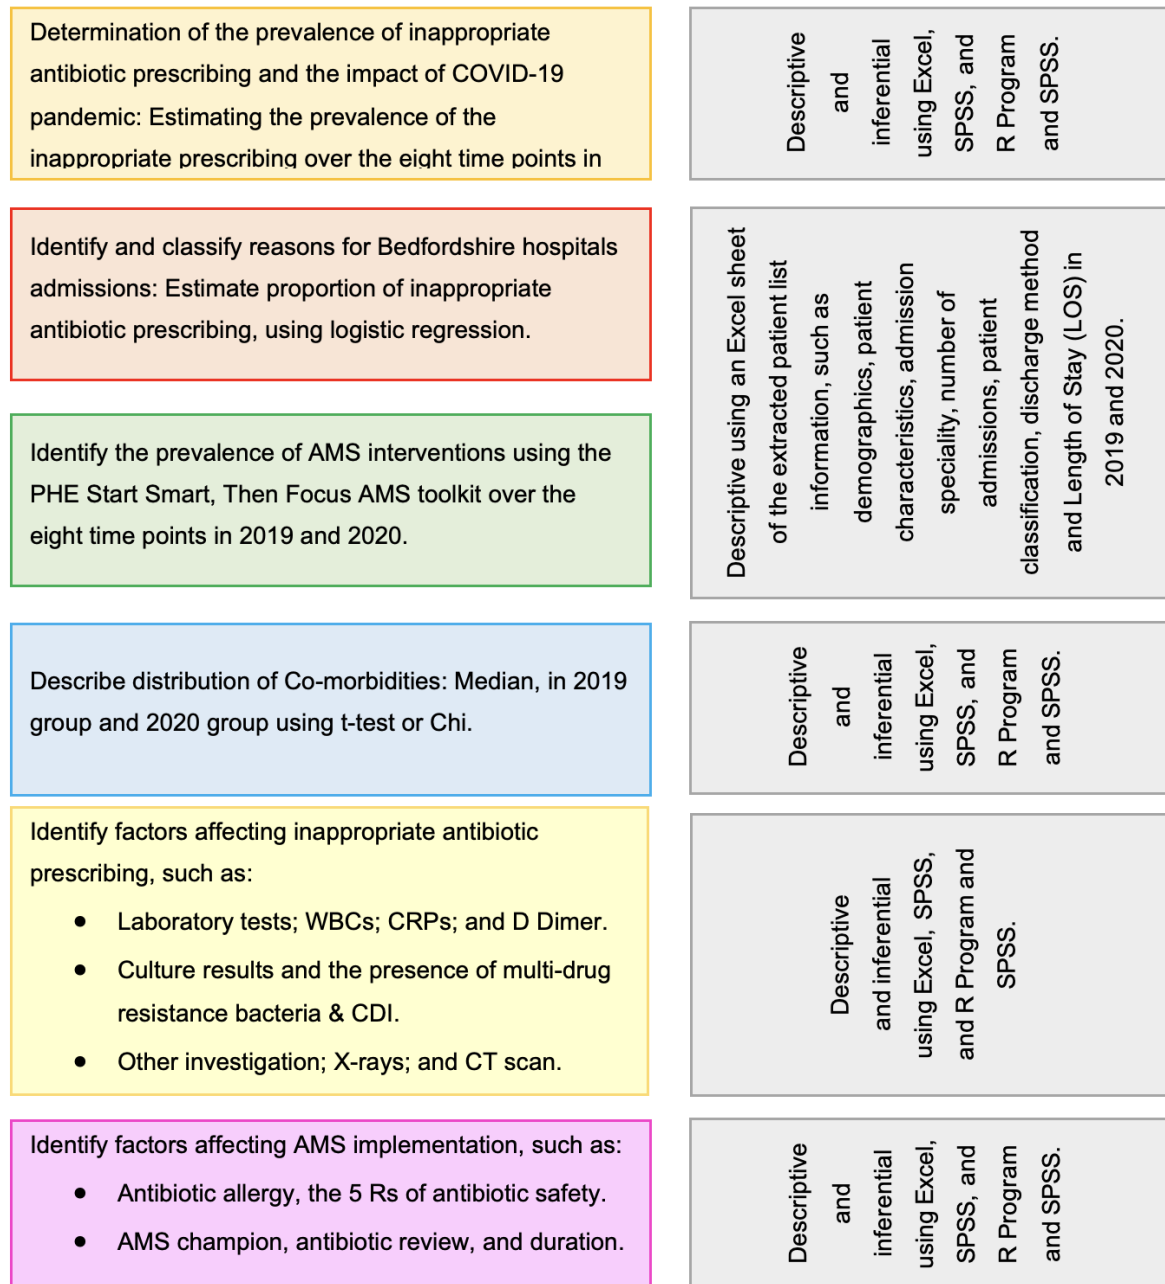

**Table S1.** Data Extraction Tool used in this retrospective study.

| Patient Demography                                                                                                                                                                                                                                           |                                                                                                                                                                                                                                                                                 |
|--------------------------------------------------------------------------------------------------------------------------------------------------------------------------------------------------------------------------------------------------------------|---------------------------------------------------------------------------------------------------------------------------------------------------------------------------------------------------------------------------------------------------------------------------------|
| Patient Study ID number:                                                                                                                                                                                                                                     | Patient hospital number:                                                                                                                                                                                                                                                        |
| Patient age:                                                                                                                                                                                                                                                 | Gender:                                                                                                                                                                                                                                                                         |
| Start Smart                                                                                                                                                                                                                                                  |                                                                                                                                                                                                                                                                                 |
| Allergies:                                                                                                                                                                                                                                                   | Date of admission:                                                                                                                                                                                                                                                              |
| Main diagnosis/Clinical Indication:                                                                                                                                                                                                                          | Medical history / Co-morbidities:                                                                                                                                                                                                                                               |
| Name of Initial antibiotic: (dose, frequency, route, and duration)                                                                                                                                                                                           | Is the duration/stop date documented (Y/N)?                                                                                                                                                                                                                                     |
| Is complies with local guidelines (Y/N)?                                                                                                                                                                                                                     | Did culture send to Mic prior to Abx (Y/N)                                                                                                                                                                                                                                      |
| <b>Clinical investigations:</b> <ul style="list-style-type: none"> <li>• X-Ray finding:</li> <li>• Blood culture results:</li> <li>• WBCs count:</li> <li>• CRP result:</li> <li>• D Dimer result:</li> <li>• PCT result:</li> <li>• Urea result:</li> </ul> | <b>Other relevant clinical information:</b> <ul style="list-style-type: none"> <li>• Symptoms on admission</li> <li>• Confusion (Y/N):</li> <li>• Others:</li> </ul>                                                                                                            |
| Then Focus                                                                                                                                                                                                                                                   |                                                                                                                                                                                                                                                                                 |
| Is abx clinically reviewed? (Y/N)                                                                                                                                                                                                                            | If yes, what is the review day, e.g., D1, D2, D3...?                                                                                                                                                                                                                            |
| If yes, who reviewed the Antibiotics? <ul style="list-style-type: none"> <li>• Prescribing Doctor</li> <li>• Pharmacist</li> </ul>                                                                                                                           | <b>What type of AMS intervention:</b> <ul style="list-style-type: none"> <li>• Continue Antibiotics</li> <li>• Change Antibiotics</li> <li>• Escalation</li> <li>• De-Escalation</li> <li>• IV-to-Oral Switch</li> <li>• Stop Antibiotics</li> <li>• No Intervention</li> </ul> |
| Antibiotic change (Escalation/De-escalation)                                                                                                                                                                                                                 |                                                                                                                                                                                                                                                                                 |
| What are the cultural results?                                                                                                                                                                                                                               | What is culture sensitivity results (S/R/I/NA)?                                                                                                                                                                                                                                 |
| What is the name of the antibiotic changed after the culture results?                                                                                                                                                                                        | Is the changed antibiotic appropriately selected (Y/N)?                                                                                                                                                                                                                         |
| IV-to-Oral Switch                                                                                                                                                                                                                                            |                                                                                                                                                                                                                                                                                 |
| Name of changed Oral Antibiotics?                                                                                                                                                                                                                            | Is the changed antibiotic appropriately selected (Y/N)?                                                                                                                                                                                                                         |
| Abx Stop                                                                                                                                                                                                                                                     |                                                                                                                                                                                                                                                                                 |
| When the antibiotic has been stopped?                                                                                                                                                                                                                        | Is antibiotic stop complying with the local guidelines (Y/N)?                                                                                                                                                                                                                   |
| Infection Control / Healthcare-associated infection (If the patient developed Secondary infection)?                                                                                                                                                          |                                                                                                                                                                                                                                                                                 |
| MRSA bacteremia (Y/N)                                                                                                                                                                                                                                        | CDI (Y/N)                                                                                                                                                                                                                                                                       |
| MDRO (Y/N)                                                                                                                                                                                                                                                   | COVID-19 (Y/N)                                                                                                                                                                                                                                                                  |
| Antibiotic Safety Alert                                                                                                                                                                                                                                      |                                                                                                                                                                                                                                                                                 |
| Is there any antibiotic allergic reaction? (Y/N)?                                                                                                                                                                                                            | Is the antibiotic prescribed comply with the 5Rs, i.e. Right drug, dose, duration, route, and frequency)?                                                                                                                                                                       |
| Patient Outcome                                                                                                                                                                                                                                              |                                                                                                                                                                                                                                                                                 |
| What is the patient outcome(Discharged=1, Deceased=2)?                                                                                                                                                                                                       | If discharged, what is the discharge date?                                                                                                                                                                                                                                      |
| What is the Length of Stay (LOS)?                                                                                                                                                                                                                            |                                                                                                                                                                                                                                                                                 |
